# Supplementary material for: Development of Polycistronic Baculovirus Surface Display Vectors to Simultaneously Express Viral Proteins of Porcine Reproductive and Respiratory Syndrome and Analysis of Their Immunogenicity in Swine
Source: MDPI journal article supplement (doi:10.3390/vaccines11111666), 2023-10-31
Supplement: s1 [file s1]

Supplementary Table S1. PRRSV primers used in this study

| Gene | Sequence (5'-3')*                                                                                               | Expected size<br>(bp) |
|------|-----------------------------------------------------------------------------------------------------------------|-----------------------|
| GP2  | F: GCAC <u>GTCTG</u> ACTCACCATCGCCGGTT(SalI)<br>R: AC <u>GGATCC</u> ACTCAAAGTACTATTATACAC(Bam HI)               | 444                   |
| GP2  | F: AC <u>GCTAGCT</u> CACCATCGCCGGTTGGCTG(Nhe I)<br>R: AC <u>ATCGATA</u> CTCAAAGTACTATTATACAC(Cla I)             | 444                   |
| GP3  | F: GCAC <u>GTCTG</u> ACTGCCTCACCCGGCAAGC(SalI)<br>R: AC <u>GGATCCT</u> GAAATGTTGTCATGGCG(BamHI)                 | 318                   |
| GP3  | F: AC <u>CTCGAGT</u> GCCTCACCCGGCAAGC(XhoI)<br>R: <u>CGAATTCT</u> GAAATGTTGTCATGGCG (EcoRI)                     | 318                   |
| GP4  | F: AAC <u>GCATG</u> CCCATGTTTCAGTTCGAG(SphI)<br>R: AAC <u>ACCGGT</u> TCCCTTTTCGCTCATCTC(AgeI)                   | 267                   |
| GP4  | F: AC <u>CTCGAGC</u> CATGTTTCAGTTCGAG(XhoI)<br>R: <u>CGAATTC</u> TCCCTTTTCGCTCATCTC(EcoRI)                      | 267                   |
| GP5  | F:AAC <u>CTCGAGC</u> CAAACACCAGCTCTTACTCCCAG(Xho I)<br>R:AA <u>ATCTAGA</u> ACGCCCCAATGAAATTTGTC(Xba I)          | 111                   |
| GP5  | F:CCAACAAC <u>GCGGCCG</u> CCCAAACACCAGCTCTTACTCCCAG(Not I)<br>R: GCAC <u>GTCTGAC</u> ACGCCCCAATGAAATTTGTC(SalI) | 111                   |
| GP5  | F: AAC <u>GCATG</u> CCCAAACACCAGCTCTTACTCCCAG(SphI)<br>R:AAA <u>ACCGGT</u> ACGCCCCAATGAAATTTGTC(Age I)          | 111                   |
| GP5  | F: AACAAC <u>CATATG</u> CCCAAACACCAGCTCTTACTCCCAG(Nde I)<br>R:AC <u>GCTAGC</u> ACGCCCCAATGAAATTTGTC(Nhe I)      | 111                   |
| M    | F:AC <u>CTCGAG</u> ATGGGGTCGTCCCTAGACGAC(Xho I)<br>R: <u>CGAATTC</u> CTGCGGAGCCGTGCT(EcoRI)                     | 48                    |
| M    | F:AACAC <u>CATATG</u> ATGGGGTCGTCCCTAGACGCA(Nde I)<br>R:AC <u>GCTAGC</u> CTGCGGAGCCGTGC(Nhe I)                  | 48                    |

\*Underlines indicate the location of restriction sites.
